# Supplementary material
Source: PubMed Central journal article supplement (PMC9487469)
Supplement: err_0081-2011_supplementary_data.pdf [file err_0081-2011_supplementary_data.pdf]

# **Asthma control in Europe over past five years: Results of three cross-sectional surveys**

P. Demoly<sup>1</sup>, K. Annunziata<sup>2</sup>, E Gubba<sup>3</sup>, L. Adamek<sup>4</sup>

<sup>1</sup>Allergy Division, Pneumology Department, INSERM U657, Hôpital Arnaud de Villeneuve, University Hospital of Montpellier, Montpellier, France

<sup>2</sup>Kantar Health, Princeton, New Jersey, USA

<sup>3</sup>Post Synaptic Ltd, London, UK

<sup>4</sup>GlaxoSmithKline, Respiratory Centre of Excellence, Uxbridge, UK

## **Supplementary Data**

**Table S1: Number (%) of asthma respondents taking part in the European National Health and Wellness Surveys in 2006, 2008 and 2010**

| Patients, n (%) | Took the survey on one out of three years | Took the survey on two out of three years |                 | Took the survey on three out of three years | Total      |
|-----------------|-------------------------------------------|-------------------------------------------|-----------------|---------------------------------------------|------------|
|                 |                                           | Only completed once <sup>1</sup>          | Completed twice |                                             |            |
| 2006            | 1765 (85)                                 | 96 (5)                                    | 142 (7)         | 68 (3)                                      | 2071 (100) |
| 2008            | 2658 (84)                                 | 168 (5)                                   | 253 (8)         | 76 (2)                                      | 3155 (100) |
| 2010            | 2566 (92)                                 | 111 (4)                                   | 46 (2)          | 71 (3)                                      | 2794 (100) |

<sup>1</sup> Respondents given the survey twice but only completed one of them

**Table S2: Prevalence of asthma control in treated asthma by country in 2006, 2008, 2010**

|          | All countries |      |      | France |      |      | Germany |      |      | Italy |      |      | Spain |      |      | UK   |       |       |
|----------|---------------|------|------|--------|------|------|---------|------|------|-------|------|------|-------|------|------|------|-------|-------|
|          | 2006          | 2008 | 2010 | 2006   | 2008 | 2010 | 2006    | 2008 | 2010 | 2006  | 2008 | 2010 | 2006  | 2008 | 2010 | 2006 | 2008  | 2010  |
| N sizes  | 1862          | 2903 | 3147 | 337    | 628  | 696  | 374     | 646  | 600  | 151   | 164  | 231  | 184   | 96   | 168  | 816  | 1,369 | 1,452 |
| NWC (%)  | 55.0          | 56.6 | 53.5 | 55.9   | 50.4 | 56.8 | 72.3    | 67.3 | 62.5 | 61.4  | 66.5 | 54.1 | 45.0  | 47.3 | 48.0 | 44.8 | 51.2  | 48.1  |
| ALWC (%) | 45.0          | 43.4 | 46.5 | 44.1   | 49.6 | 43.2 | 27.7    | 32.8 | 37.5 | 38.6  | 33.5 | 45.9 | 55.0  | 52.7 | 52.0 | 55.2 | 48.8  | 51.9  |

NWC: not-well controlled; ALWC: at least well-controlled asthma

**Table S3a: Healthcare utilisation, health-related quality of life and work productivity in asthma patients by control status and by country in 2006**

|                                                            | All countries   |                 | France          |                 | Germany         |                 | Italy           |                 | Spain           |                 | UK               |                 |
|------------------------------------------------------------|-----------------|-----------------|-----------------|-----------------|-----------------|-----------------|-----------------|-----------------|-----------------|-----------------|------------------|-----------------|
|                                                            | NWC             | ALWC            | NWC              | ALWC            |
| Subjects, n                                                | 1159            | 1178            | 229             | 247             | 307             | 179             | 114             | 119             | 93              | 134             | 416              | 499             |
| <b>Healthcare utilisation (during previous 6 months)</b>   |                 |                 |                 |                 |                 |                 |                 |                 |                 |                 |                  |                 |
| Number of times spoken to doctor about asthma <sup>1</sup> | 3.36<br>(3.98)  | 1.60<br>(2.48)  | 3.64<br>(3.61)  | 1.63<br>(1.95)  | 3.79<br>(4.11)  | 2.08<br>(1.97)  | 3.01<br>(4.68)  | 1.88<br>(3.63)  | 3.67<br>(3.94)  | 2.06<br>(4.02)  | 2.87<br>(3.49)   | 1.12<br>(1.21)  |
| p-value                                                    | <0.001          |                 | <0.001          |                 | <0.001          |                 | 0.153           |                 | 0.021           |                 | <0.001           |                 |
| Emergency room visits                                      | 0.59<br>(1.79)  | 0.28<br>(0.74)  | 0.34<br>(0.88)  | 0.16<br>(0.52)  | 0.39<br>(0.93)  | 0.15<br>(0.56)  | 0.38<br>(1.25)  | 0.29<br>(0.68)  | 1.36<br>(2.01)  | 0.72<br>(1.15)  | 0.82<br>(2.74)   | 0.24<br>(0.68)  |
| p-value                                                    | <0.001          |                 | 0.017           |                 | 0.004           |                 | 0.642           |                 | 0.018           |                 | <0.001           |                 |
| Number of days hospitalised                                | 1.46<br>(6.28)  | 0.56<br>(4.16)  | 0.96<br>(3.76)  | 0.69<br>(6.28)  | 2.8<br>(10.19)  | 0.95<br>(6.63)  | 0.56<br>(2.16)  | 0.68<br>(2.41)  | 1.35<br>(4.42)  | 0.38<br>(1.32)  | 0.88<br>(3.00)   | 0.35<br>(2.53)  |
| p-value                                                    | 0.001           |                 | 0.604           |                 | 0.052           |                 | 0.767           |                 | 0.058           |                 | 0.012            |                 |
| <b>SF-12 scores</b>                                        |                 |                 |                 |                 |                 |                 |                 |                 |                 |                 |                  |                 |
| PCS                                                        | 40.3<br>(11.26) | 48.0<br>(9.16)  | 41.8<br>(10.18) | 47.3<br>(9.55)  | 38.9<br>(10.66) | 46.5<br>(8.02)  | 42.1<br>(12.0)  | 48.9<br>(8.31)  | 42.5<br>(10.14) | 48.6<br>(8.16)  | 39.4<br>(11.98)  | 48.4<br>(9.97)  |
| p-value                                                    | <0.001          |                 | <0.001          |                 | <0.001          |                 | <0.001          |                 | <0.001          |                 | <0.001           |                 |
| MCS                                                        | 44.0<br>(11.36) | 47.0<br>(9.90)  | 45.0<br>(10.49) | 47.1<br>(10.14) | 44.8<br>(11.16) | 49.0<br>(8.44)  | 43.5<br>(11.54) | 44.8<br>(9.40)  | 42.9<br>(10.37) | 47.4<br>(9.89)  | 43.19<br>(12.12) | 47.0<br>(10.37) |
| p-value                                                    | <0.001          |                 | 0.043           |                 | <0.001          |                 | 0.503           |                 | 0.01            |                 | <0.001           |                 |
| <b>Work productivity and activity impairment</b>           |                 |                 |                 |                 |                 |                 |                 |                 |                 |                 |                  |                 |
| % work time missed due to health                           | 10.2<br>(25.0)  | 6.1<br>(20.13)  | 9.2<br>(25.05)  | 8.3<br>(24.91)  | 14.8<br>(20.90) | 5.8<br>(17.58)  | 5.8<br>(14.75)  | 5.2<br>(18.65)  | 9.62<br>(24.09) | 7.66<br>(22.98) | 10.2<br>(24.84)  | 5.2<br>(18.10)  |
| p-value                                                    | 0.010           |                 | 0.807           |                 | 0.045           |                 | 0.087           |                 | 0.698           |                 | 0.055            |                 |
| % impairment while at work due to health                   | 24.6<br>(25.65) | 15.3<br>(19.99) | 24.3<br>(23.68) | 15.6<br>(19.22) | 25.8<br>(26.38) | 19.5<br>(20.44) | 20.7<br>(23.0)  | 12.9<br>(17.39) | 27.7<br>(29.09) | 17.4<br>(20.21) | 26.1<br>(26.49)  | 13.9<br>(20.90) |

|                                     |                 |                 |                 |                 |                 |                 |                 |                 |                 |                 |                 |                 |
|-------------------------------------|-----------------|-----------------|-----------------|-----------------|-----------------|-----------------|-----------------|-----------------|-----------------|-----------------|-----------------|-----------------|
| p-value                             | <0.001          |                 | 0.009           |                 | 0.133           |                 | 0.04            |                 | 0.058           |                 | <0.001          |                 |
| % activity impairment due to health | 42.6<br>(30.30) | 23.5<br>(27.11) | 41.2<br>(29.61) | 24.1<br>(28.13) | 44.1<br>(31.39) | 24.3<br>(25.25) | 36.5<br>(24.74) | 20.8<br>(26.19) | 38.3<br>(29.02) | 23.0<br>(24.74) | 46.7<br>(32.05) | 24.1<br>(28.49) |
| p-value                             | <0.001          |                 | <0.001          |                 | <0.001          |                 | 0.001           |                 | 0.001           |                 | <0.001          |                 |

<sup>1</sup>includes any form of contact, not just clinic visits. Data presented as mean (SD). NWC: Not well-controlled; ALWC: At least well-controlled;

PCS: physical component summary score; MCS: mental component summary score

In NHWS 2006, the hospitalisation question was phrased as follows: 'What is the total number of days you were hospitalised for your own medical condition in the past six months?' In NHWS 2008 & 2010, the question wording was changed to 'How many times have you been hospitalised for your own medical condition in the past six months?'

**Table S3b: Healthcare utilisation, health-related quality of life and work productivity in asthma patients by control status and by country in 2008**

|                                                            | All countries   |                 | France          |                 | Germany         |                 | Italy           |                 | Spain           |                 | UK              |                 |
|------------------------------------------------------------|-----------------|-----------------|-----------------|-----------------|-----------------|-----------------|-----------------|-----------------|-----------------|-----------------|-----------------|-----------------|
|                                                            | NWC             | ALWC            |
| Subjects, n                                                | 1827            | 1792            | 377             | 528             | 507             | 315             | 150             | 83              | 59              | 77              | 734             | 789             |
| <b>Healthcare utilisation (during previous 6 months)</b>   |                 |                 |                 |                 |                 |                 |                 |                 |                 |                 |                 |                 |
| Number of times spoken to doctor about asthma <sup>1</sup> | 3.15<br>(3.66)  | 1.48<br>(1.89)  | 3.67<br>(3.87)  | 1.70<br>(2.32)  | 3.43<br>(3.45)  | 1.86<br>(1.84)  | 3.74<br>(4.51)  | 1.53<br>(1.64)  | 2.37<br>(2.89)  | 1.48<br>(2.23)  | 2.52<br>(3.28)  | 1.10<br>(1.39)  |
| p-value                                                    | <0.001          |                 | <0.001          |                 | <0.001          |                 | <0.001          |                 | 0.077           |                 | <0.001          |                 |
| Emergency room visits                                      | 0.60<br>(2.44)  | 0.24<br>(0.72)  | 0.27<br>(0.74)  | 0.17<br>(0.50)  | 0.46<br>(2.61)  | 0.16<br>(0.59)  | 0.48<br>(1.06)  | 0.18<br>(0.55)  | 1.83<br>(5.53)  | 0.56<br>(0.87)  | 0.58<br>(1.46)  | 0.25<br>(0.85)  |
| p-value                                                    | <0.001          |                 | 0.032           |                 | 0.086           |                 | 0.027           |                 | 0.081           |                 | <0.001          |                 |
| Number of times hospitalised                               | 0.43<br>(2.82)  | 0.15<br>(0.63)  | 0.44<br>(3.29)  | 0.16<br>(0.48)  | 0.45<br>(2.56)  | 0.32<br>(1.16)  | 0.15<br>(0.58)  | 0.03<br>(0.18)  | 1.31<br>(6.14)  | 0.10<br>(0.38)  | 0.28<br>(1.56)  | 0.10<br>(0.39)  |
| p-value                                                    | 0.001           |                 | 0.073           |                 | 0.463           |                 | 0.088           |                 | 0.131           |                 | 0.003           |                 |
| <b>SF-12 scores</b>                                        |                 |                 |                 |                 |                 |                 |                 |                 |                 |                 |                 |                 |
| PCS                                                        | 40.6<br>(11.55) | 48.0<br>(10.26) | 42.6<br>(11.62) | 48.5<br>(10.68) | 38.9<br>(10.74) | 47.2<br>(8.87)  | 43.7<br>(9.82)  | 51.8<br>(7.42)  | 42.2<br>(10.15) | 48.0<br>(8.25)  | 38.9<br>(12.94) | 47.1<br>(11.68) |
| p-value                                                    | <0.001          |                 | <0.001          |                 | <0.001          |                 | <0.001          |                 | <0.001          |                 | <0.001          |                 |
| MCS                                                        | 41.4<br>(11.51) | 46.1<br>(11.07) | 39.3<br>(10.90) | 43.3<br>(11.40) | 43.2<br>(11.77) | 49.2<br>(10.61) | 40.1<br>(10.42) | 42.8<br>(9.45)  | 42.2<br>(10.15) | 49.5<br>(8.16)  | 41.0<br>(12.33) | 46.1<br>(11.61) |
| p-value                                                    | <0.001          |                 | <0.001          |                 | <0.001          |                 | 0.077           |                 | <0.001          |                 | <0.001          |                 |
| <b>Work productivity and activity impairment</b>           |                 |                 |                 |                 |                 |                 |                 |                 |                 |                 |                 |                 |
| % work time missed due to health                           | 12.2<br>(25.59) | 5.6<br>(20.05)  | 10.1<br>(26.42) | 6.8<br>(23.08)  | 10.9<br>(23.62) | 7.8<br>(24.15)  | 10.9<br>(21.15) | 1.3<br>(4.25)   | 19.3<br>(28.75) | 4.2<br>(17.41)  | 12.8<br>(28.73) | 5.8<br>(19.77)  |
| p-value                                                    | <0.001          |                 | 0.221           |                 | 0.285           |                 | 0.005           |                 | 0.012           |                 | 0.002           |                 |
| % impairment while at work due to health                   | 30.0<br>(26.96) | 15.4<br>(21.25) | 23.8<br>(25.80) | 14.9<br>(20.87) | 34.0<br>(26.37) | 18.5<br>(22.13) | 32.7<br>(27.42) | 20.8<br>(22.62) | 28.9<br>(26.93) | 11.4<br>(19.85) | 27.5<br>(26.75) | 13.7<br>(20.39) |

|                                     |                 |                 |                 |                 |                 |                 |                 |                 |                 |                 |                 |                 |
|-------------------------------------|-----------------|-----------------|-----------------|-----------------|-----------------|-----------------|-----------------|-----------------|-----------------|-----------------|-----------------|-----------------|
| p-value                             | <0.001          |                 | 0.001           |                 | <0.001          |                 | 0.02            |                 | 0.005           |                 | <0.001          |                 |
| % activity impairment due to health | 45.8<br>(30.15) | 25.3<br>(27.58) | 42.3<br>(31.13) | 28.5<br>(29.29) | 48.2<br>(28.70) | 24.6<br>(25.77) | 40.0<br>(28.26) | 21.0<br>(21.61) | 40.8<br>(26.87) | 21.9<br>(26.12) | 50.1<br>(32.09) | 25.9<br>(29.13) |
| p-value                             | <0.001          |                 | <0.001          |                 | <0.001          |                 | <0.001          |                 | <0.001          |                 | <0.001          |                 |

<sup>1</sup>includes any form of contact, not just clinic visits. Data presented as mean (SD). NWC: Not well-controlled; ALWC: At least well-controlled;

PCS: physical component summary score; MCS: mental component summary score

In NHWS 2006, the hospitalisation question was phrased as follows: 'What is the total number of days you were hospitalised for your own medical condition in the past six months?' In NHWS 2008 & 2010, the question wording was changed to 'How many times have you been hospitalised for your own medical condition in the past six months?'
